# Supplementary material for: Two essential Thioredoxins mediate apicoplast biogenesis, protein import, and gene expression in Toxoplasma gondii
Source: PLOS journal article supplement (doi:10.1371/journal.ppat.1006836), 2018-02-22
Supplement: S8 (10.1371/journal.ppat.1006836.s008) [file journal.ppat.1006836.s008]

## **Supplementary Material and Methods:**

### ***In vitro* insulin turbidity assay**

Insulin aggregation upon reduction of disulphides was monitored by the increase in light scatter at 650 nm. Two  $\mu$ M human thioredoxin or PDI or ATrx2 (expressed and isolated from *E. coli*, as described above) were mixed in 50 mM sodium phosphate pH 7.5, 2 mM EDTA, 0.33 mM DTT and added to a 96 well plate. One hundred  $\mu$ M human insulin (Sigma, I9278) was added to start the reaction and light scatter was measured over time. This experiment was performed once.

### **Recombinant protein expression and isolation**

Expression of 6xHis-tagged ATrx2 from pET28a was carried out at 16 °C for 12 – 15 hours, using 0.1 mM IPTG. Refolding/re-solubilisation was carried out using a 5 mL Histrap column (GE Healthcare), pre-equilibrated with 10 times column volume (CV) of buffer RB (50 mM Na-Phosphate pH = 8, 100 mM NaCl, 8 M Urea, 20 mM Imidazole, 10 mM BME). Sample was filtered and loaded on to the column using a 1 mL/min flow rate. Washing of unbound proteins was done using 10 CV of buffer A (50 mM Na-Phosphate pH=8, 100 mM NaCl, 3 M Urea, 10 % Glycerol, 20 mM Imidazole, 10 mM BME). Elution was done step-wise, first with a gradient of 10 % Buffer B (buffer A lacking urea) for 6 CV, followed by 100 % buffer B for 8 CV. Fraction from peaks at 10 and 100 % buffer B elutions were analysed on SDS-PAGE and then Coomassie-stained.
